# Supplementary material for: Fractal porosity in metals synthesized by a simple combustion reaction
Source: Royal Society of Chemistry journal article supplement (doi:10.1039/c2ra22441k), 2012-12-06

## Supporting Information

### Fractal porosity in metals synthesized by a simple combustion reaction

Pedro Gómez-Romero<sup>a,b\*</sup> and Belen Ballesteros<sup>a</sup>

# Ni

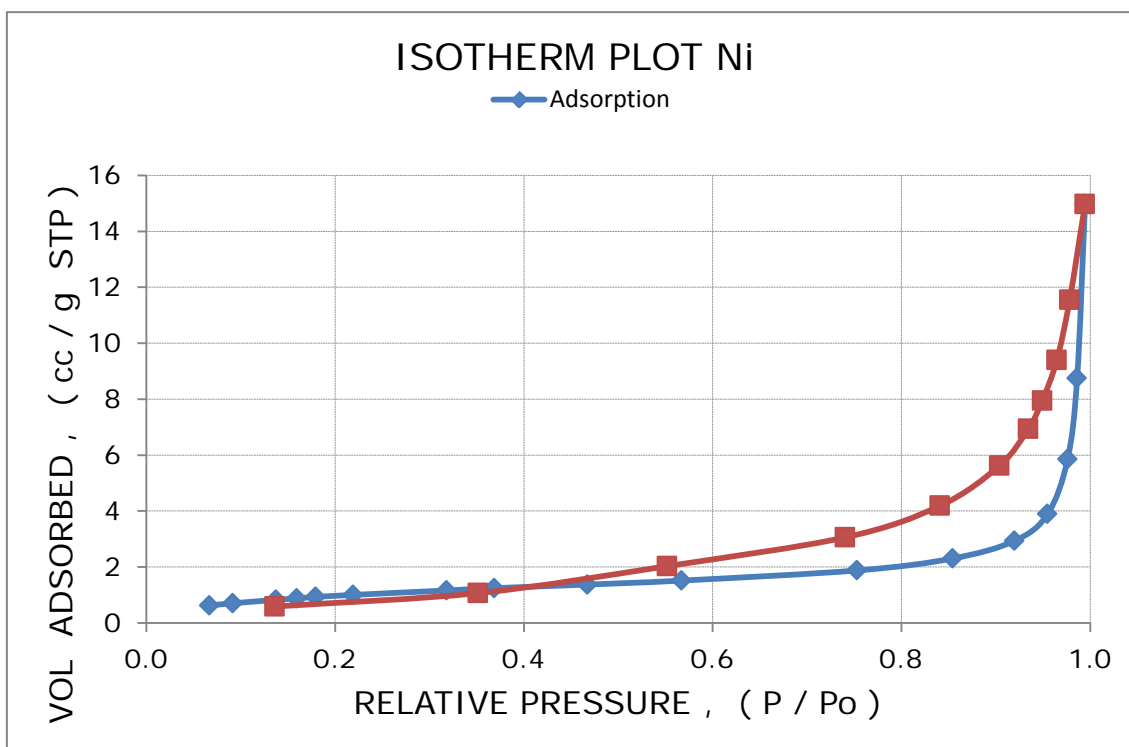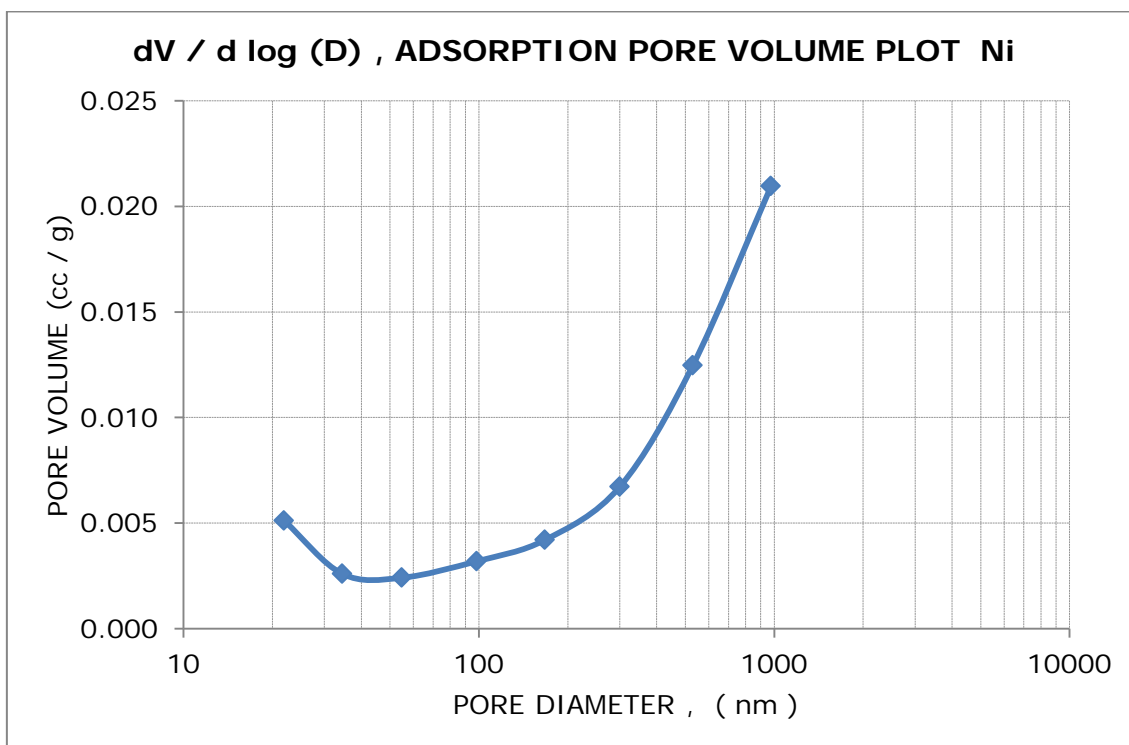

Co

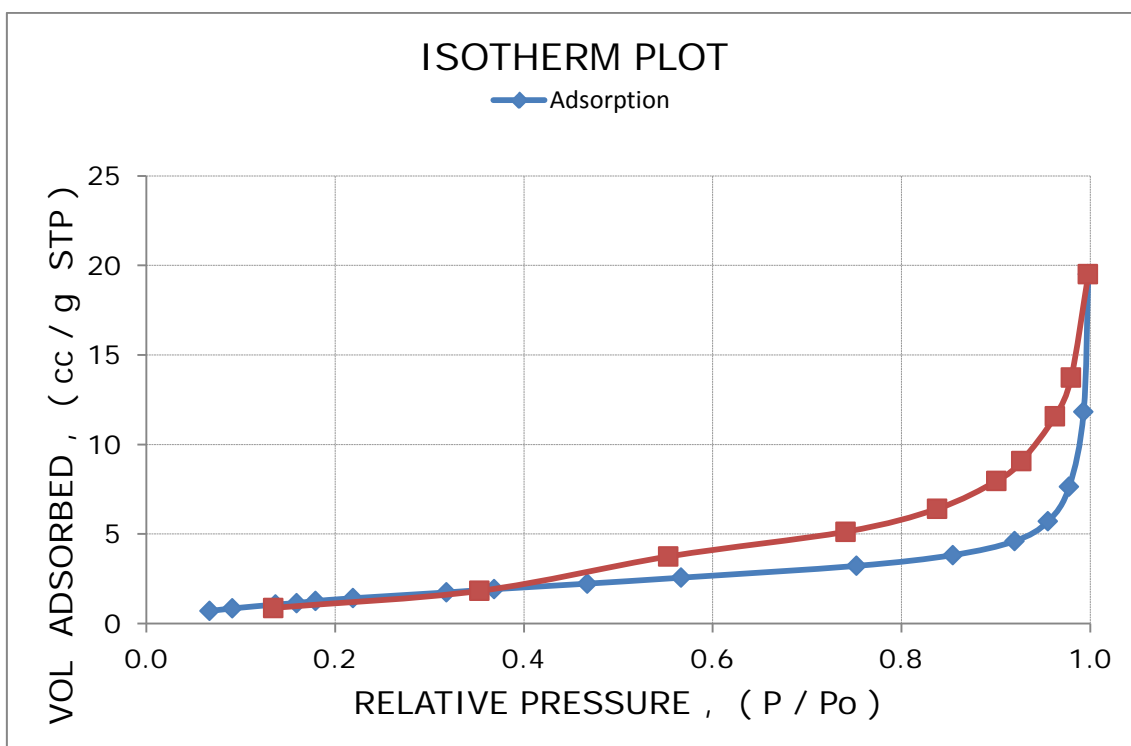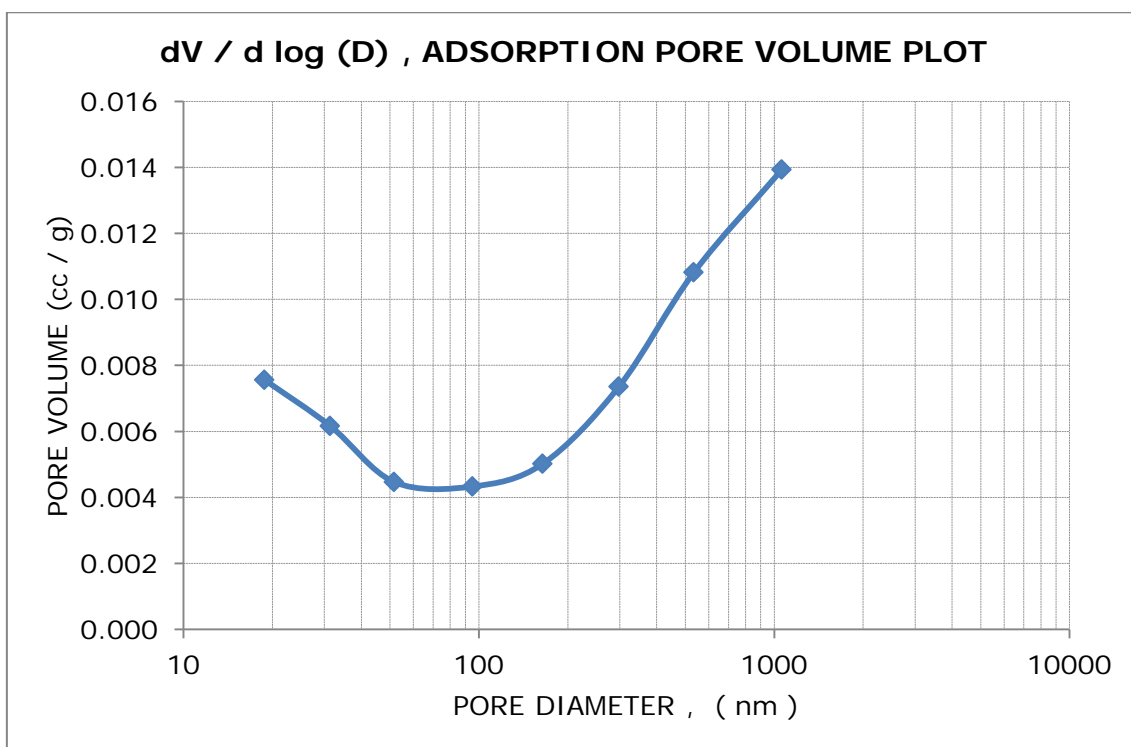

Fe

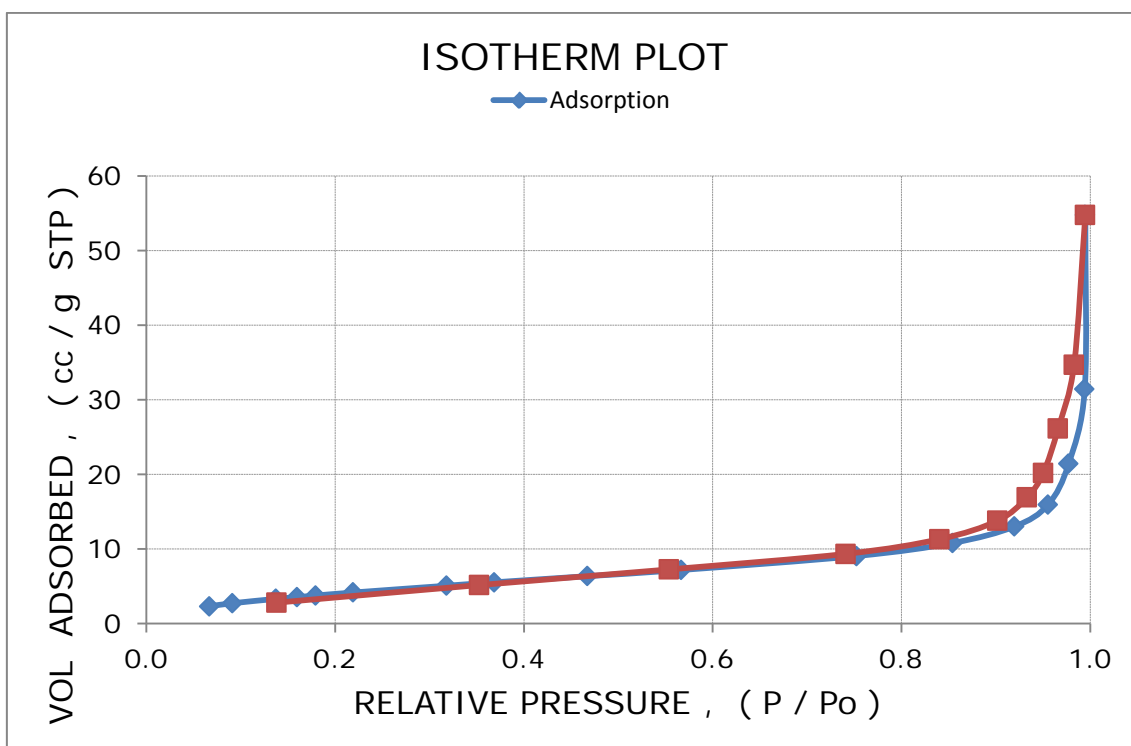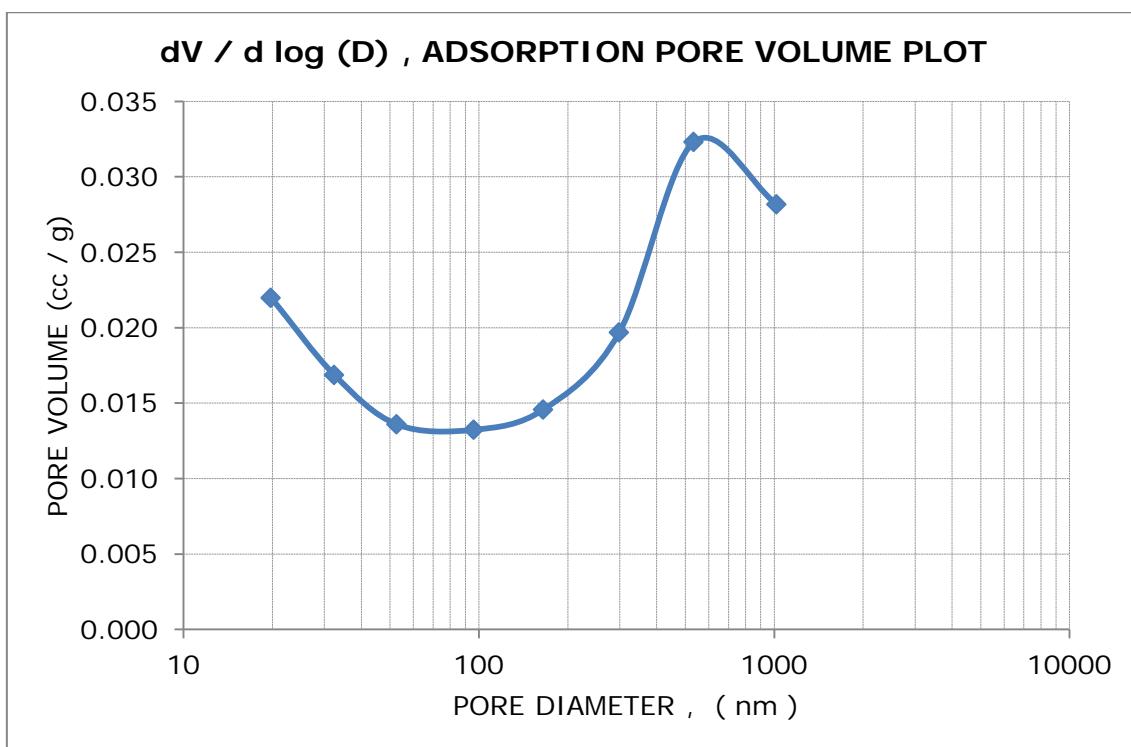

Cu

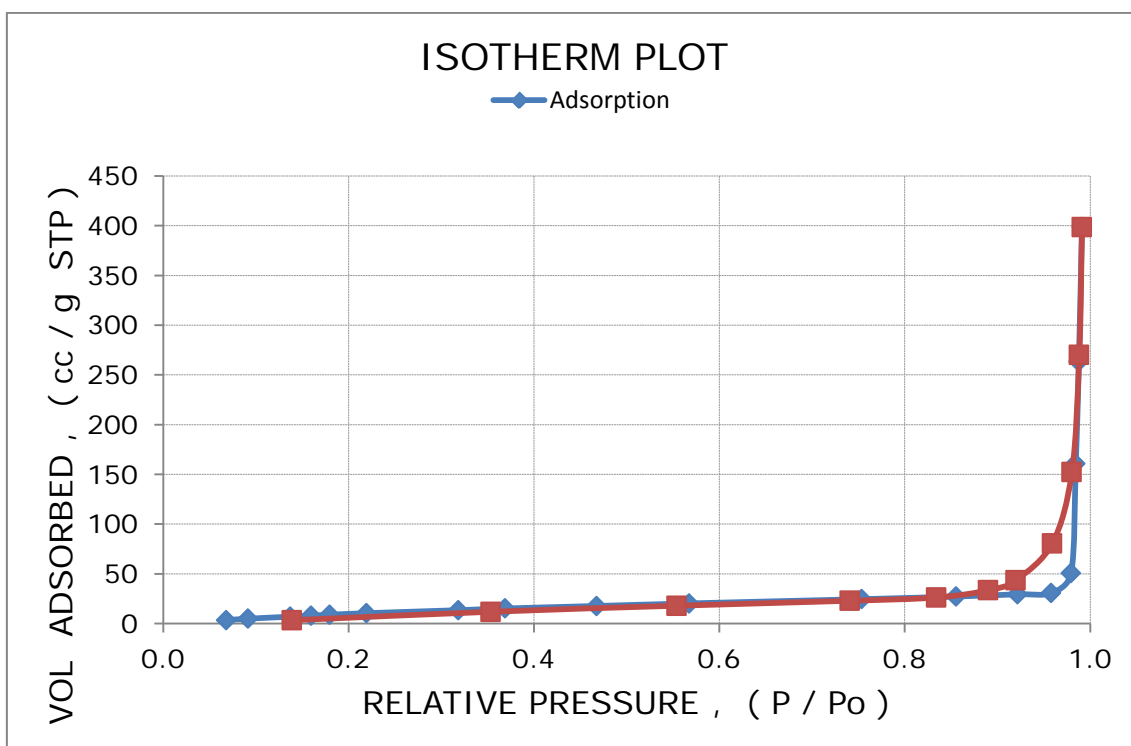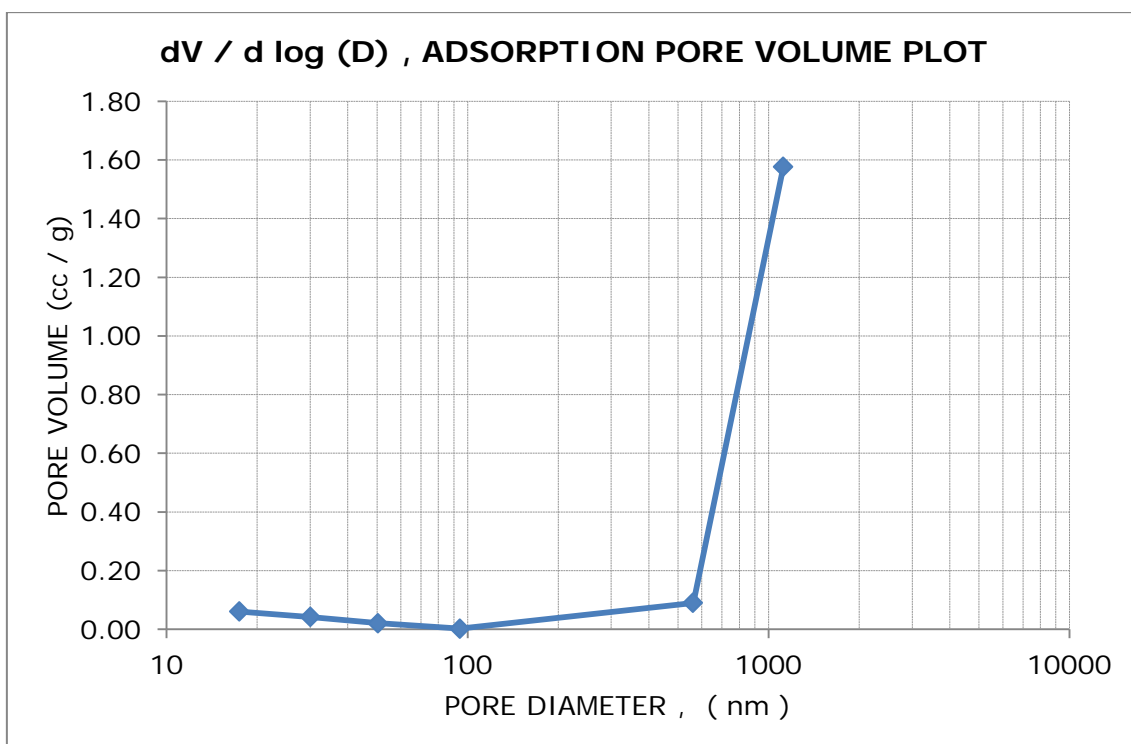

Ag

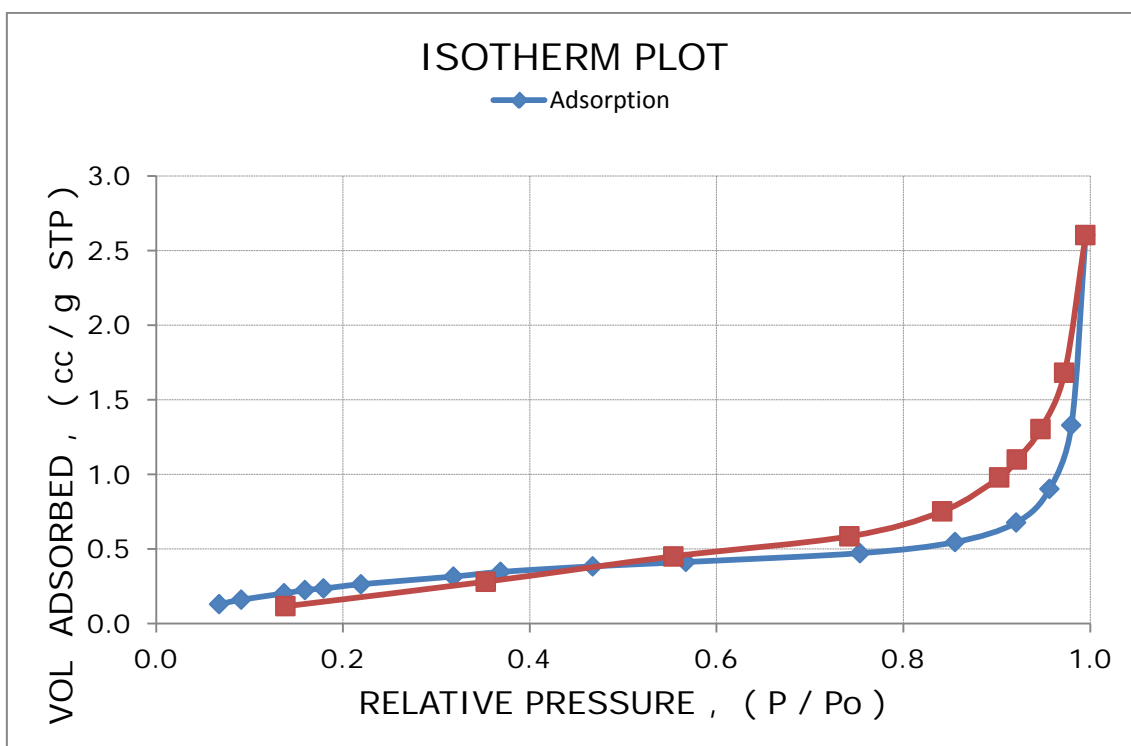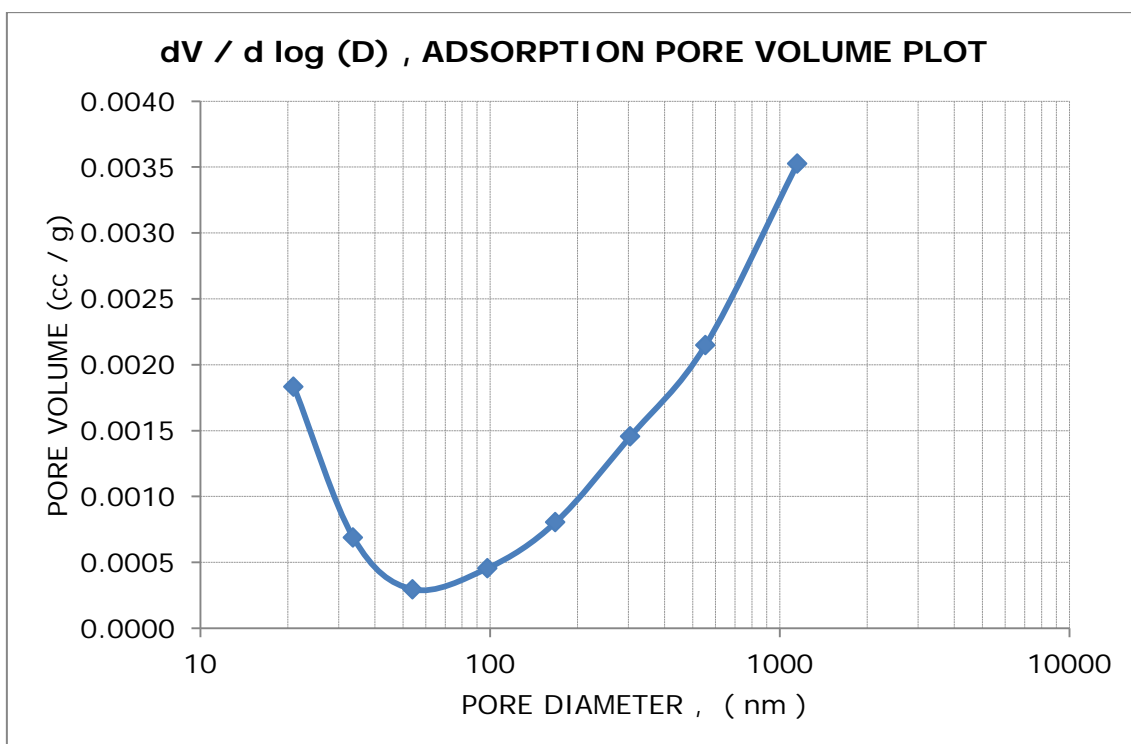

Supplement: c2ra22441k.pdf [file c2ra22441k.pdf]
